# Supplementary material for: Early Prediction of COVID-19 Severity Using Extracellular Vesicles and Extracellular RNAs
Source: bioRxiv or medRxiv preprint supplement (doi:10.1101/2020.10.14.20212340), 2020-10-16
Supplement: Supplementary file [file media-1.pdf]

## 1 **Supplementary Informations**

### 2 **Methods**

#### 3 **Study subjects**

4 We enrolled 42 patients positive for SARS-CoV-2 who were admitted to the  
5 Jikei University Hospital between March and May 2020 (approved by the Institutional  
6 Review Board at The Jikei University School of Medicine (Number: 32-055(10130)).  
7 COVID-19 patients were recruited on the basis of positive PCR tests for SARS-CoV-2  
8 RNA obtained by nasopharyngeal swabs. The eventual degree of COVID-19 severity was  
9 categorized as mild or severe on the basis of WHO 2020 scoring (**Table S2**). 11 Patients  
10 with severe COVID-19 at admission were excluded. At the time of admission, all  
11 COVID-19 patients were scored as having a mild status (WHO score = 3). Based on the  
12 clinical disease course after admission, we divided 31 patients in two groups (namely,  
13 Group 1: mild cases (WHO score  $\leq$  4), and Group 2: severe cases (WHO score  $\geq$  5)). All  
14 patients received standard therapy without corticosteroids according to Clinical  
15 management of COVID-19 interim guidance by WHO. 10 healthy age-matched donors  
16 were recruited at Omiya City Clinic, Saitama for routine medical examination between  
17 March and April 2019 (approved by the Institutional Review Board at The Institute of  
18 Medical Science, The University of Tokyo (Number: 28-19-0907). The medical records  
19 of COVID-19 patients and healthy donors were analyzed retrospectively. 31 serum  
20 samples taken at admission from COVID-19 patients and 10 serum samples taken from  
21 healthy donors were separated by centrifugation at 3000 rpm for 10 min at 4°C. The  
22 supernatant was collected into a new tube and the serum sample was stored at -80°C until  
23 use.  
24

#### 25 **Isolation of EVs**

26 Anti-CD9 antibody and anti-CD63 antibody (H.U. Group Research Institute, Tokyo)  
27 coupled to Dynabeads M-280 Tosylactivated (Thermo Fisher Scientific Inc, Waltham,  
28 MA, USA) were added to aliquots (500  $\mu$ L) of the serum samples that had been treated  
29 with chelate-based PEVIA<sup>®</sup> reagent (H.U. Group Research Institute), followed by  
30 incubation on a rotator at 4°C for 18 h. The beads were washed three times with PBS and  
31 stored at 4°C until further analysis.  
32

#### 33 **Preparation of peptides**

35 EVs were processed using S-Trap micro spin columns (AMR Inc, Tokyo, Japan)  
36 according to the manufacturer's instruction with minor modifications. In brief, captured  
37 EVs were suspended in 50  $\mu$ L of 5% SDS (FUJIFILM Wako Pure Chemical Corporation,  
38 Osaka, Japan) in 50mM TEAB buffer (Honeywell Inc, Charlotte, NC, USA), pH7.5. After  
39 removing beads, the amount of protein from EVs were determined by Micro BCA™  
40 Protein Assay Kit (Thermo Fisher Scientific Inc). 13.8 ng Pierce™ Digestion Indicator  
41 for Mass Spectrometry (Thermo Fisher Scientific Inc) was added to lysed samples for  
42 quality control of digestion efficiency. The samples were then reduced and alkylated with  
43 dithiothreitol (FUJIFILM Wako Pure Chemical Corporation) and iodoacetamide (Nacalai  
44 tesque Inc, Kyoto, Japan), respectively. 12% aqueous phosphoric acid (FUJIFILM Wako  
45 Pure Chemical Corporation) was added to a final concentration of 1.2% followed by six  
46 times the volume of S-Trap protein binding buffer. The sample mixtures were added to  
47 S-Trap columns that were prewashed and preconditioned with 0.2 % formic acid in 50 %  
48 acetonitrile and S-Trap buffer, respectively. The S-Trap columns were washed with  
49 150uL S-Trap buffer. Centrifugation and removal of the flow through were then repeated  
50 6 times. Washed columns were incubated with 20uL of digestion buffer containing 0.75ug  
51 Trypsin/Lys-C Mix, Mass Spec Grade (Promega Corporation, Madison, WI, USA) for  
52 2hr at 47°C. After digestion, peptides were eluted from the S-Trap column, lyophilized  
53 with miVac system (Genevac Ltd, Ipswich, United Kingdom), and stored at -80 °C until  
54 use.

55

#### 56 **Proteomic analysis with LC-MS**

57 Peptides obtained from EV proteins were reconstituted in 10  $\mu$ l of water containing 0.1%  
58 formic acid (FA) (Fisher Chemical, Thermo Fisher Scientific Inc). Quantification of  
59 peptides was accomplished using Pierce™ Quantitative Fluorometric Peptide Assay  
60 (Thermo Fisher Scientific Inc). Proteomic analysis of the peptides was carried out using  
61 Q Exactive (Thermo Fisher Scientific Inc.) equipped with UltiMate 3000 Nano LC  
62 Systems (Thermo Fisher Scientific Inc.). Peptide samples (1  $\mu$ g) were injected onto  
63 Acclaim PepMap 1000 trap columns (75  $\mu$ m  $\times$  2 cm, nanoViper C18 3  $\mu$ m, 100Å, Thermo  
64 Fisher Scientific Inc) which were heated to 40 °C in a chamber which was connected to  
65 a C18 reverse-phase Aurora UHPLC Emitter Column with nano Zero & Captive Spray  
66 Insert (75  $\mu$ m  $\times$  25 cm, Ion Opticks Pty Ltd) using Dreamspray interface (AMR Inc). The  
67 nano pump flow rate was set to 250 nL/min with a 302 min gradient, in which the mobile  
68 phases were A (0.1% FA in water, Fisher Chemical, Thermo Fisher Scientific Inc.) and

69 B (0.1% FA in acetonitrile, Fisher Chemical, Thermo Fisher Scientific Inc.). The  
70 chromatography gradient was designed to provide a linear increase from 0-8 min at 2%  
71 B, 8-272 min from 2% B to 35% B, 272-282 min from 35% B to 70% B, 282-283 min  
72 from 70% B to 95% B, wash, 8 min and 10 min equilibrium. The data-dependent  
73 acquisition was performed in positive ion mode. Mass spectrometry parameters and those  
74 of the Proteome Discoverer 2.2.0.388 software (Thermo Fisher Scientific Inc) were  
75 described in a previous report (doi: <https://doi.org/10.1101/2020.06.17.155861>).

76

### 77 **Analysis of serum exRNA profiles**

78 Total RNA was extracted from aliquots (200  $\mu$ L) of the serum samples using QIAzol and  
79 the miRNeasy Mini Kit (Qiagen, Hilden, Germany) according to the manufacturer's  
80 protocol. The library was prepared using the QIAseq miRNA Library Kit (Qiagen).  
81 Library preparations were subjected to quality control using either a Bioanalyzer 2100 or  
82 TapeStation 4200 system (Agilent Technologies, Santa Clara, CA, USA). The library  
83 pools were quantified using the Library Quantification Kit (Takara, Shiga, Japan) and  
84 sequenced on the NovaSeq 6000 sequencing platform (Illumina Inc, San Diego, CA,  
85 USA). Reads were pre-processed and annotated against miRBase v22.1 and Ensembl  
86 non-coding RNA database release 100 by using CLC Genomics Workbench v20.0.1. Raw  
87 and normalized microarray data is available in the Gene Expression Omnibus database  
88 (GSE158877).

89

### 90 **Statistical analysis**

91 Fisher's exact test for categorical variables and unpaired Student's *t*-test for continuous  
92 variables were used to compare clinical data between two groups. To identify biomarker  
93 candidates among EV proteins and exRNAs, we initially used one-way analysis of  
94 variance (ANOVA) to select candidates present at different levels in the three subject  
95 groups (uninfected, COVID-19 Group 1, and Group 2) with  $P < 0.05$ . Principal  
96 component analysis (PCA) was performed with the selected candidates using Partek  
97 Genomics Suite 7.0 (Partek, St. Louis, MO, USA). Second, candidates with better  
98 discrimination between Group 1 and 2 were selected based on linear discriminant analysis  
99 with leave-one-out cross-validation, and subsequent ROC analysis was performed using  
100 R version 3.6.3 (R Foundation for Statistical Computing, <http://www.R-project.org>),  
101 compute.es package version 0.2-2, hash package version 2.2.6.1, MASS package version  
102 7.3-51.5, mutoss package version 0.1-12, and pROC package version 1.16.2. Optimal cut-

103 off values for each candidate were set based on the maximum point of the sum of  
104 sensitivity and specificity (Youden index). Predictive sensitivity, specificity, and  
105 accuracy were calculated with the corresponding cut-off value for each candidate.  
106 Kaplan–Meier analysis with log-rank test and Cox regression analysis were performed  
107 using IBM SPSS Statistics 25 (IBM Japan, Tokyo, Japan). The correlation plot was  
108 generated using R version 3.6.3 and corrplot package version 0.84., and the unsupervised  
109 hierarchical clustering analysis was performed using Partek Genomics Suite 7.0. The  
110 limit of statistical significance for all analyses was defined as a two-sided P value of 0.05.  
111  
112

113 **Supplementary Data**

114 **Figure S1.** Clinical factors at admission for early prediction of COVID-19 severity.

115

116 **Table S1.** Baseline characteristics of healthy donors and COVID-19 patients.

117 **Table S2.** WHO 2020 scoring for COVID-19 cases used in this study.

118 **Table S3.** Differences in clinical characteristics among healthy donors and COVID-19  
119 patients.

120 **Table S4.** EV proteins for discrimination between mild and severe COVID-19 patients.

121 **Table S5.** ExRNAs for discrimination between mild and severe COVID-19 patients.

122 **Table S6.** Univariate Cox regression analysis of the selected factors and biomarkers for  
123 predicting COVID-19 severity in this patient cohort.

124

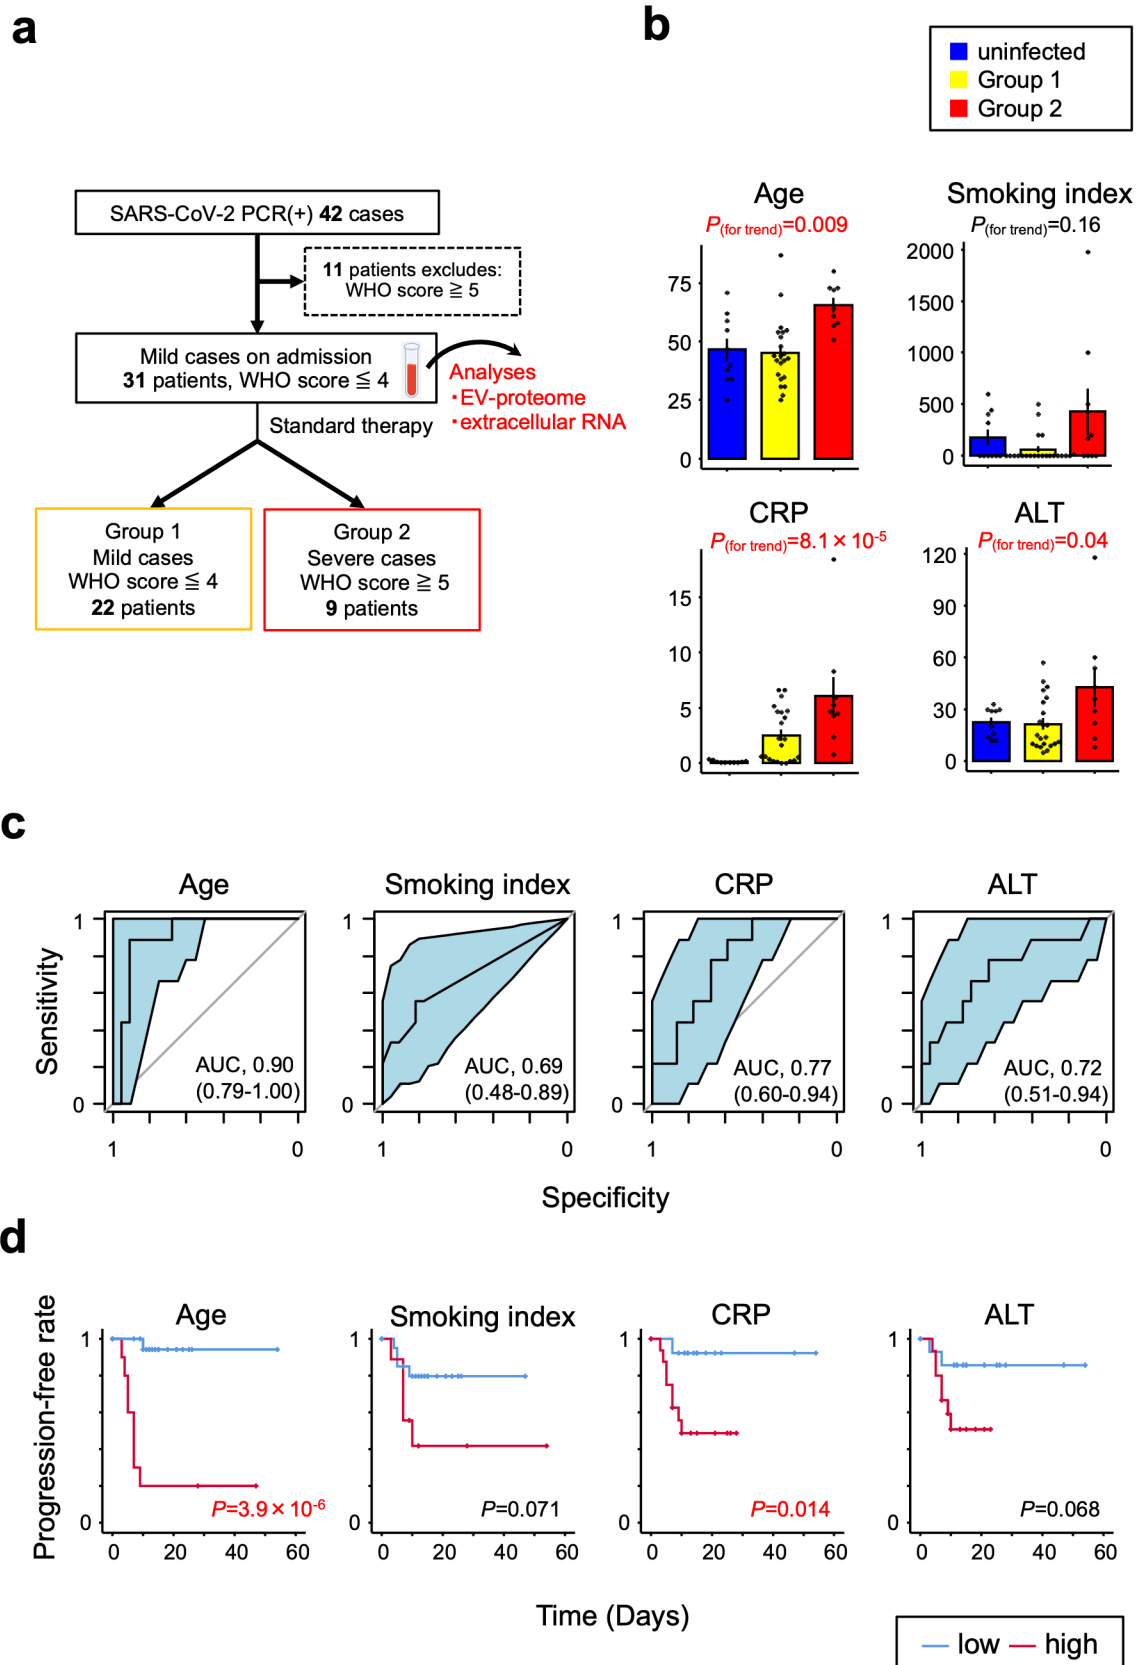

**Figure S1. Clinical factors at admission for early prediction of COVID-19 severity.** (a) Patient recruitment flowchart for this cohort. (b) Correlations of age, smoking index, CRP, and ALT between the three subject groups.  $P$  values for trend by *Pearson's* correlation analysis. Error bars represent mean  $\pm$  SEM. (c) The AUC (95% CI) for age, smoking index, CRP, and ALT evaluated by ROC analysis. (d) Kaplan-Meier curves for age, smoking index, CRP, and ALT by Log-rank test. Time represents the number of days from admission to time of onset for a severe COVID-19 related event. In each case, optimal cut-off values were used to define high and low groups.

**Table S1. Baseline characteristics of healthy donors and COVID-19 patients.**

|                  | Patients | WHO score | WHO category | Age (10-year range) | Sex | Onset of severe events (day) <sup>†</sup> | The period of hospital stay | Outcome                    |
|------------------|----------|-----------|--------------|---------------------|-----|-------------------------------------------|-----------------------------|----------------------------|
| Healthy donor    | HD-1     | 0         | uninfected   | 30's                | M   | -                                         | -                           | -                          |
|                  | HD-2     | 0         | uninfected   | 30's                | M   | -                                         | -                           | -                          |
|                  | HD-3     | 0         | uninfected   | 20's                | F   | -                                         | -                           | -                          |
|                  | HD-4     | 0         | uninfected   | 40's                | M   | -                                         | -                           | -                          |
|                  | HD-5     | 0         | uninfected   | 70's                | M   | -                                         | -                           | -                          |
|                  | HD-6     | 0         | uninfected   | 50's                | M   | -                                         | -                           | -                          |
|                  | HD-7     | 0         | uninfected   | 60's                | M   | -                                         | -                           | -                          |
|                  | HD-8     | 0         | uninfected   | 40's                | M   | -                                         | -                           | -                          |
|                  | HD-9     | 0         | uninfected   | 50's                | M   | -                                         | -                           | -                          |
|                  | HD-10    | 0         | uninfected   | 30's                | F   | -                                         | -                           | -                          |
| Group 1 COVID-19 | 1        | 3→3       | mild→mild    | 30's                | M   | -                                         | 15                          | discharged                 |
|                  | 2        | 3→3       | mild→mild    | 30's                | M   | -                                         | 14                          | discharged                 |
|                  | 3        | 3→3       | mild→mild    | 40's                | M   | -                                         | 10                          | discharged                 |
|                  | 4        | 3→3       | mild→mild    | 40's                | M   | -                                         | 13                          | discharged                 |
|                  | 5        | 3→3       | mild→mild    | 50's                | M   | -                                         | 21                          | discharged                 |
|                  | 6        | 3→3       | mild→mild    | 50's                | M   | -                                         | 26                          | discharged                 |
|                  | 7        | 3→3       | mild→mild    | 80's                | M   | -                                         | 28                          | discharged                 |
|                  | 8        | 3→3       | mild→mild    | 50's                | F   | -                                         | 25                          | discharged                 |
|                  | 9        | 3→3       | mild→mild    | 20's                | F   | -                                         | 11                          | discharged                 |
|                  | 10       | 3→3       | mild→mild    | 20's                | F   | -                                         | 23                          | discharged                 |
|                  | 11       | 3→3       | mild→mild    | 40's                | F   | -                                         | 15                          | discharged                 |
|                  | 12       | 3→3       | mild→mild    | 40's                | M   | -                                         | 12                          | discharged                 |
|                  | 13       | 3→3       | mild→mild    | 70's                | M   | -                                         | 47                          | discharged                 |
|                  | 14       | 3→3       | mild→mild    | 40's                | M   | -                                         | 54                          | discharged                 |
|                  | 15       | 3→3       | mild→mild    | 40's                | M   | -                                         | 9                           | discharged                 |
|                  | 16       | 3→3       | mild→mild    | 50's                | M   | -                                         | 15                          | discharged                 |
|                  | 17       | 3→3       | mild→mild    | 30's                | F   | -                                         | 12                          | discharged                 |
|                  | 18       | 3→3       | mild→mild    | 50's                | M   | -                                         | 18                          | discharged                 |
|                  | 19       | 3→3       | mild→mild    | 40's                | F   | -                                         | 21                          | discharged                 |
|                  | 20       | 3→3       | mild→mild    | 30's                | M   | -                                         | 0                           | to medical facility        |
|                  | 21       | 3→3       | mild→mild    | 30's                | F   | -                                         | 0                           | to medical facility        |
|                  | 22       | 3→3       | mild→mild    | 40's                | M   | -                                         | 7                           | discharged                 |
| Group 2 COVID-19 | 23       | 3→7       | mild→severe  | 60's                | M   | 5                                         | 93                          | discharged                 |
|                  | 24       | 3→7       | mild→severe  | 80's                | M   | 4                                         | 23                          | death (pulmonary embolism) |
|                  | 25       | 3→7       | mild→severe  | 60's                | M   | 3                                         | 138                         | still hospitalized         |
|                  | 26       | 3→7       | mild→severe  | 70's                | M   | 9                                         | 44                          | discharged                 |
|                  | 27       | 3→7       | mild→severe  | 70's                | M   | 7                                         | 29                          | discharged                 |
|                  | 28       | 3→7       | mild→severe  | 70's                | M   | 7                                         | 125                         | still hospitalized         |
|                  | 29       | 3→7       | mild→severe  | 50's                | M   | 10                                        | 43                          | death (ARDS)               |
|                  | 30       | 3→6       | mild→severe  | 50's                | M   | 5                                         | 31                          | discharged                 |
|                  | 31       | 3→5       | mild→severe  | 50's                | M   | 7                                         | 16                          | discharged                 |

M, male; F, female; † Day after sampling point on admission.

**Table S2. WHO 2020 scoring for COVID-19 cases used in this study.**

| <b>Patient</b>              | <b>Descriptor</b>                                            | <b>Score</b> |
|-----------------------------|--------------------------------------------------------------|--------------|
| Uninfected                  | No clinical or virological evidence of infection             | 0            |
| Ambulatory                  | No limitation of activities                                  | 1            |
|                             | Limitation of activities                                     | 2            |
| Hospitalized-mild disease   | No oxygen therapy                                            | 3            |
|                             | Oxygen by nasal prongs or mask                               | 4            |
| Hospitalized-severe disease | Non-invasive ventilation of high-flow oxygen                 | 5            |
|                             | Intubation and mechanical ventilation                        | 6            |
|                             | Ventilation + additional organ support (pressors, RRT, ECMO) | 7            |

RRT, renal replacement therapy; ECMO, extracorporeal membrane oxygenation.



**Table S3. Differences in clinical characteristics among healthy donors and COVID-19 patients.**

|                                 | uninfected<br>(n=10) | Group 1 COVID-19<br>(n=22) | Group 2 COVID-19<br>(n=9) | P value                   |                       |
|---------------------------------|----------------------|----------------------------|---------------------------|---------------------------|-----------------------|
|                                 |                      |                            |                           | (uninfected vs. infected) | (Group 1 vs. Group 2) |
| Age (year)                      | 46.5 ± 14.8          | 45.3 ± 14.3                | 65.4 ± 9.5                | 0.42                      | 0.001                 |
| Sex                             |                      |                            |                           |                           |                       |
| Men                             | 8 (80%)              | 15 (68.2%)                 | 9 (100%)                  | 1.00                      | 0.08                  |
| Women                           | 2 (20%)              | 7 (31.8%)                  | 0 (0%)                    |                           |                       |
| BMI (kg/m <sup>2</sup> )        | 22.8 ± 4.4           | 23.0 ± 3.0 (n=20)          | 22.4 ± 3.2                | 0.95                      | 0.63                  |
| Smoking index                   | 176 ± 237            | 60 ± 140                   | 427 ± 670                 | 0.94                      | 0.02                  |
| WBC count (10 <sup>3</sup> /μL) | 6.7 ± 2.9            | 4.6 ± 1.5                  | 5.2 ± 3.2                 | 0.03                      | 0.46                  |
| CRP (mg/dL)                     | 0.12 ± 0.12          | 2.50 ± 2.41                | 6.07 ± 5.11               | 0.01                      | 0.01                  |
| BUN (mg/dL)                     | 13.7 ± 4.5           | 17.0 ± 16.6                | 22.6 ± 14.6               | 0.35                      | 0.39                  |
| Cr (mg/dL)                      | 0.84 ± 0.13          | 1.72 ± 3.22                | 1.88 ± 2.4                | 0.33                      | 0.90                  |
| ALT (IU/L)                      | 22.5 ± 8.5           | 21.4 ± 15.2                | 42.6 ± 33.2               | 0.51                      | 0.02                  |
| CK (IU/L)                       | NA                   | 69.5 ± 44.1                | 71.8 ± 50.8               | NA                        | 0.90                  |
| D-dimer (μg/mL)                 | NA                   | 1.8 ± 2.0 (n=12)           | 1.1 ± 0.4                 | NA                        | 0.28                  |
| Fbg (mg/dL)                     | NA                   | 389.0 ± 84.2 (n=7)         | 480.4 ± 172.2             | NA                        | 0.22                  |
| Hypertension                    | 2 (20.0%)            | 6 (27.3%)                  | 3 (33.3%)                 | 0.70                      | 1.00                  |
| Diabetes mellitus               | 0 (0%)               | 5 (22.7%)                  | 3 (33.3%)                 | 0.17                      | 0.66                  |
| Dyslipidemia                    | 0 (0%)               | 4 (18.2%)                  | 3 (33.3%)                 | 0.16                      | 0.38                  |
| Colony heart disease            | 0 (0%)               | 2 (9.1%)                   | 0 (0%)                    | 1.00                      | 1.00                  |

Continuous variables were expressed as mean ± SD and tested by unpaired Student's *t*-test. Categorical variables were expressed as n (%) and tested by Fisher's exact test.

**Table S4. EV proteins for discrimination between mild and severe COVID-19 patients.**

| GeneName  | Cross-validation score | Sensitivity | Specificity | Accuracy | AUC  |
|-----------|------------------------|-------------|-------------|----------|------|
| COPB2     | 1.00                   | 1.00        | 1.00        | 1.00     | 1.00 |
| KRAS      | 0.90                   | 1.00        | 0.82        | 0.87     | 0.93 |
| PRKCB     | 0.90                   | 0.89        | 0.95        | 0.94     | 0.93 |
| RHOC      | 0.90                   | 0.78        | 1.00        | 0.94     | 0.96 |
| CD147     | 0.87                   | 0.67        | 0.91        | 0.84     | 0.73 |
| CAPN2     | 0.87                   | 0.89        | 0.77        | 0.81     | 0.84 |
| ECM1      | 0.87                   | 0.67        | 0.95        | 0.87     | 0.82 |
| FGG       | 0.87                   | 0.67        | 1.00        | 0.90     | 0.87 |
| MFAP4     | 0.87                   | 0.56        | 1.00        | 0.87     | 0.75 |
| ADI1      | 0.84                   | 0.67        | 0.95        | 0.87     | 0.88 |
| AK1       | 0.84                   | 0.89        | 0.91        | 0.90     | 0.95 |
| MGAT1     | 0.84                   | 1.00        | 0.77        | 0.84     | 0.91 |
| CLDN3     | 0.84                   | 0.89        | 0.82        | 0.84     | 0.86 |
| CRP       | 0.84                   | 0.78        | 0.77        | 0.77     | 0.82 |
| UQCRC2    | 0.84                   | 0.78        | 0.82        | 0.81     | 0.77 |
| FGA       | 0.84                   | 0.67        | 0.95        | 0.87     | 0.88 |
| FGB       | 0.84                   | 0.67        | 1.00        | 0.90     | 0.84 |
| FGL1      | 0.84                   | 0.78        | 0.82        | 0.81     | 0.85 |
| GPX1      | 0.84                   | 0.67        | 0.91        | 0.84     | 0.81 |
| GSK3B     | 0.84                   | 0.44        | 1.00        | 0.84     | 0.73 |
| LBP       | 0.84                   | 0.78        | 0.86        | 0.84     | 0.82 |
| PDGFC     | 0.84                   | 0.89        | 0.77        | 0.81     | 0.86 |
| RAB13     | 0.84                   | 0.78        | 0.86        | 0.84     | 0.85 |
| RAP1B     | 0.84                   | 0.67        | 1.00        | 0.90     | 0.91 |
| SLC6A4    | 0.84                   | 0.89        | 0.82        | 0.84     | 0.90 |
| UBA7      | 0.84                   | 0.78        | 0.86        | 0.84     | 0.83 |
| ORM1      | 0.81                   | 0.89        | 0.59        | 0.68     | 0.80 |
| RNPEP     | 0.81                   | 0.56        | 0.95        | 0.84     | 0.68 |
| ANGPT1    | 0.81                   | 0.78        | 0.86        | 0.84     | 0.88 |
| APOB      | 0.81                   | 0.78        | 0.86        | 0.84     | 0.79 |
| B4GALT1   | 0.81                   | 0.67        | 0.95        | 0.87     | 0.79 |
| BHMT      | 0.81                   | 0.44        | 1.00        | 0.84     | 0.74 |
| CPN1      | 0.81                   | 0.89        | 0.68        | 0.74     | 0.84 |
| GNAZ      | 0.81                   | 1.00        | 0.95        | 0.97     | 0.99 |
| ICAM2     | 0.81                   | 1.00        | 0.59        | 0.71     | 0.83 |
| SELL      | 0.81                   | 0.67        | 0.91        | 0.84     | 0.74 |
| MAN1A1    | 0.81                   | 0.78        | 0.82        | 0.81     | 0.85 |
| SERPINA5  | 0.81                   | 0.89        | 0.82        | 0.84     | 0.81 |
| PACSIN2   | 0.81                   | 0.89        | 0.86        | 0.87     | 0.90 |
| NCF1B     | 0.81                   | 0.89        | 0.55        | 0.65     | 0.73 |
| TMEM59    | 0.81                   | 0.44        | 0.95        | 0.81     | 0.59 |
| YWHAB     | 0.77                   | 0.67        | 0.95        | 0.87     | 0.85 |
| ABAT      | 0.77                   | 0.33        | 1.00        | 0.81     | 0.52 |
| ADH1B     | 0.77                   | 0.67        | 0.95        | 0.87     | 0.79 |
| ASL       | 0.77                   | 0.67        | 0.91        | 0.84     | 0.80 |
| ASS1      | 0.77                   | 0.78        | 0.86        | 0.84     | 0.79 |
| CDH2      | 0.77                   | 0.56        | 0.95        | 0.84     | 0.69 |
| CAB39     | 0.77                   | 0.89        | 0.91        | 0.90     | 0.94 |
| CPS1      | 0.77                   | 0.67        | 0.82        | 0.77     | 0.74 |
| CD226     | 0.77                   | 0.67        | 1.00        | 0.90     | 0.87 |
| COL6A3    | 0.77                   | 0.67        | 0.86        | 0.81     | 0.82 |
| CUL4A     | 0.77                   | 0.78        | 0.64        | 0.68     | 0.75 |
| DSC1      | 0.77                   | 0.44        | 0.95        | 0.81     | 0.58 |
| ENTPD5    | 0.77                   | 1.00        | 0.64        | 0.74     | 0.86 |
| EIF4A1    | 0.77                   | 0.67        | 0.86        | 0.81     | 0.80 |
| FN1       | 0.77                   | 0.89        | 0.68        | 0.74     | 0.81 |
| PGC       | 0.77                   | 0.89        | 0.68        | 0.74     | 0.78 |
| RHEB      | 0.77                   | 1.00        | 0.59        | 0.71     | 0.84 |
| GNAI2     | 0.77                   | 0.89        | 0.59        | 0.68     | 0.79 |
| GNB1      | 0.77                   | 0.78        | 0.77        | 0.77     | 0.83 |
| GNA13     | 0.77                   | 0.67        | 0.95        | 0.87     | 0.86 |
| ITGA2B    | 0.77                   | 0.67        | 0.91        | 0.84     | 0.86 |
| ITGB1     | 0.77                   | 1.00        | 0.59        | 0.71     | 0.84 |
| ILK       | 0.77                   | 0.89        | 0.77        | 0.81     | 0.84 |
| F11R      | 0.77                   | 1.00        | 0.50        | 0.65     | 0.82 |
| LTA4H     | 0.77                   | 0.56        | 0.91        | 0.81     | 0.67 |
| LIMS1     | 0.77                   | 0.89        | 0.77        | 0.81     | 0.83 |
| NAV2      | 0.77                   | 0.56        | 0.86        | 0.77     | 0.73 |
| FAM129B   | 0.77                   | 0.78        | 0.86        | 0.84     | 0.84 |
| NNMT      | 0.77                   | 0.67        | 0.91        | 0.84     | 0.69 |
| NID1      | 0.77                   | 0.89        | 0.55        | 0.65     | 0.76 |
| PPIA      | 0.77                   | 0.78        | 0.77        | 0.77     | 0.86 |
| PLA1A     | 0.77                   | 0.67        | 0.91        | 0.84     | 0.80 |
| PPBP      | 0.77                   | 0.67        | 0.77        | 0.74     | 0.69 |
| PECAM1    | 0.77                   | 1.00        | 0.55        | 0.68     | 0.82 |
| GP1BB     | 0.77                   | 0.67        | 0.86        | 0.81     | 0.81 |
| PCSK9     | 0.77                   | 1.00        | 0.82        | 0.87     | 0.91 |
| MENT      | 0.77                   | 0.44        | 0.95        | 0.81     | 0.71 |
| SERPINA10 | 0.77                   | 0.67        | 0.82        | 0.77     | 0.74 |
| F2RL3     | 0.77                   | 0.89        | 0.86        | 0.87     | 0.91 |
| LOX       | 0.77                   | 0.67        | 0.91        | 0.84     | 0.81 |
| SFTPB     | 0.77                   | 0.67        | 0.77        | 0.74     | 0.78 |
| RAB5B     | 0.77                   | 0.78        | 0.86        | 0.84     | 0.84 |
| RALB      | 0.77                   | 0.89        | 0.68        | 0.74     | 0.82 |
| REEP6     | 0.77                   | 0.78        | 0.68        | 0.71     | 0.71 |
| RETN      | 0.77                   | 0.67        | 0.73        | 0.71     | 0.69 |
| AGXT      | 0.77                   | 0.22        | 1.00        | 0.77     | 0.48 |
| CCT2      | 0.77                   | 0.89        | 0.64        | 0.71     | 0.81 |
| THBD      | 0.77                   | 0.56        | 0.91        | 0.81     | 0.74 |
| ISG15     | 0.77                   | 0.33        | 1.00        | 0.81     | 0.67 |
| ZYX       | 0.77                   | 1.00        | 0.55        | 0.68     | 0.82 |

**Table S5. ExRNAs for discrimination between mild and severe COVID-19 patients.**

| <b>Transcript</b> | <b>Cross-validation score</b> | <b>Sensitivity</b> | <b>Specificity</b> | <b>Accuracy</b> | <b>AUC</b> |
|-------------------|-------------------------------|--------------------|--------------------|-----------------|------------|
| miR-122-5p        | 0.84                          | 0.56               | 1.00               | 0.87            | 0.81       |
| SNORD33           | 0.84                          | 1.00               | 0.73               | 0.81            | 0.89       |
| AL732437.2        | 0.84                          | 0.89               | 0.68               | 0.74            | 0.80       |
| RNU2-29P          | 0.81                          | 0.44               | 1.00               | 0.84            | 0.70       |
| CDKN2B-AS1        | 0.81                          | 0.67               | 0.95               | 0.87            | 0.86       |
| AL365184.1        | 0.81                          | 0.78               | 0.86               | 0.84            | 0.87       |
| AL365184.1        | 0.81                          | 0.78               | 0.91               | 0.87            | 0.90       |
| AL365184.1        | 0.81                          | 0.67               | 0.91               | 0.84            | 0.87       |
| AL365184.1        | 0.81                          | 0.78               | 0.91               | 0.87            | 0.90       |
| AL365184.1        | 0.81                          | 1.00               | 0.73               | 0.81            | 0.92       |
| let-7c-5p         | 0.77                          | 0.44               | 0.95               | 0.81            | 0.75       |
| miR-21-5p         | 0.77                          | 0.56               | 0.91               | 0.81            | 0.71       |
| miR-140-3p        | 0.77                          | 0.89               | 0.77               | 0.81            | 0.89       |
| C5orf66-AS2       | 0.77                          | 0.78               | 0.91               | 0.87            | 0.89       |

**Table S6. Univariate Cox regression analysis of the selected factors and biomarkers for predicting COVID-19 severity in this patient cohort.**

|                    | <b>Cut-off</b>        | <b>HR</b> | <b>(95% CI)</b>               | <b>P value</b> |
|--------------------|-----------------------|-----------|-------------------------------|----------------|
| Age high           | 56.5                  | 28.1      | (3.4 - 231.9)                 | 0.0019         |
| Smoking index high | 87.5                  | 3.1       | (0.8 - 11.6)                  | 0.092          |
| CRP high           | 2.3                   | 8.4       | (1 - 67.5)                    | 0.045          |
| ALT high           | 21.5                  | 3.8       | (0.8 - 18.5)                  | 0.095          |
| COPB2 low          | 1.6 x10 <sup>8</sup>  | NA        | -                             | -              |
| KRAS low           | 4.8 x10 <sup>7</sup>  | 189.8     | (0.4 - 9.0 x10 <sup>4</sup> ) | 0.095          |
| PRKCB low          | 6.3 x10 <sup>7</sup>  | 32.1      | (3.9 - 261.9)                 | 0.0012         |
| RHOC low           | 1.4 x10 <sup>7</sup>  | 23.6      | (4.7 - 118)                   | 0.00012        |
| CD147 high         | 6.1 x10 <sup>8</sup>  | 10.7      | (2.5 - 45.1)                  | 0.0013         |
| CAPN2 high         | 7.2 x10 <sup>5</sup>  | 15.5      | (1.9 - 125.9)                 | 0.010          |
| ECM1 high          | 2.3 x10 <sup>8</sup>  | 11.6      | (2.8 - 48.4)                  | 0.00079        |
| FGG high           | 1.4 x10 <sup>10</sup> | 21.4      | (4.2 - 110.4)                 | 0.00025        |
| MFAP4 high         | 4.6 x10 <sup>8</sup>  | 12.7      | (3.3 - 48.6)                  | 0.00022        |
| miR-122-5p high    | 1.0 x10 <sup>5</sup>  | 10.5      | (2.7 - 40.4)                  | 0.00063        |
| SNORD33 high       | 406.6                 | 104.1     | (0.4 - 2.7 x10 <sup>4</sup> ) | 0.10           |
| AL732437.2 high    | 8.8                   | 9.9       | (1.2 - 79.9)                  | 0.031          |
| RNU2-29P high      | 124.1                 | 10.4      | (2.6 - 40.8)                  | 0.00081        |
| CDKN2B-AS1 high    | 6.2                   | 14.4      | (3.4 - 61.3)                  | 0.00031        |
| AL365184.1 high    | 2.9                   | 14.2      | (1.8 - 114.4)                 | 0.013          |

HR, hazard ratio; CI, confidence interval; NA, not applicable
